# Supplementary material for: In Vitro Efficacy of Extracts and Isolated Bioactive Compounds from Ascomycota Fungi in the Treatment of Colorectal Cancer: A Systematic Review
Source: MDPI journal article supplement (doi:10.3390/ph16010022), 2022-12-23
Supplement: s1 [file s1]

## SUPPLEMENTARY MATERIAL

### In Vitro Efficacy Of Extracts And Isolated Bioactive Compounds From Ascomycota Fungi In The Treatment Of Colorectal Cancer: A Systematic Review

**Table S1.** Bioactive compounds isolated from different orders from Ascomycota.

| Bioactive compound                                                                                                                                                                             | Structures of compounds                                                                                                                                                                                                                                                                                                                                                                                                                                                                                                                                                                                                                                                                    | Isolated from Order | Reference |
|------------------------------------------------------------------------------------------------------------------------------------------------------------------------------------------------|--------------------------------------------------------------------------------------------------------------------------------------------------------------------------------------------------------------------------------------------------------------------------------------------------------------------------------------------------------------------------------------------------------------------------------------------------------------------------------------------------------------------------------------------------------------------------------------------------------------------------------------------------------------------------------------------|---------------------|-----------|
| Asperphenins A (1)<br>Asperphenins B (2)                                                                                                                                                       | 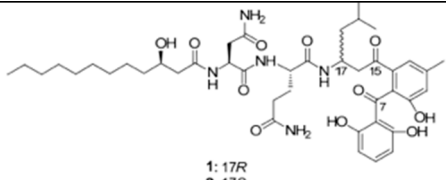<br>1: 17R<br>2: 17S                                                                                                                                                                                                                                                                                                                                                                                                                                                                                                                                                                                     | Eurotiales          | [20]      |
| Allianthrone A (4), B (5) and C (6)                                                                                                                                                            | <br>4 cis H10/H10'<br>5 trans H10/H10'<br>6 trans H10/H10'                                                                                                                                                                                                                                                                                                                                                                                                                                                                                                                                               | Eurotiales          | [34]      |
| Aspergicide B (2)<br>Aspergisdione (4)<br>Emeguisin A (5)<br>Folipastatin (6)<br>Aspergillusidone C (9)<br>Unguinol (10)<br>2-Chlorounguinol (11)<br>2,4-Dichlorounguinol (14)<br>Nidulin (15) | <br>2: R = CO <sub>2</sub> H<br>4: R = CO <sub>2</sub> H<br>5: R = Cl<br>6: R = H<br>9: R <sub>1</sub> = R <sub>4</sub> = Cl, R <sub>2</sub> = R <sub>3</sub> = R <sub>5</sub> = H<br>10: R <sub>1</sub> = R <sub>2</sub> = R <sub>3</sub> = R <sub>4</sub> = R <sub>5</sub> = H<br>11: R <sub>1</sub> = Cl, R <sub>2</sub> = R <sub>3</sub> = R <sub>4</sub> = R <sub>5</sub> = H<br>14: R <sub>1</sub> = R <sub>3</sub> = Cl, R <sub>2</sub> = R <sub>4</sub> = R <sub>5</sub> = H<br>15: R <sub>1</sub> = R <sub>3</sub> = R <sub>4</sub> = Cl, R <sub>2</sub> = H, R <sub>5</sub> = CH <sub>3</sub> | Eurotiales          | [30]      |
| Violaceimide A-E (1-5)                                                                                                                                                                         | <br>1: R = H<br>2: R = Me<br>3: R = H<br>4: R = Me<br>5                                                                                                                                                                                                                                                                                                                                                                                                                                                                                                                                                | Eurotiales          | [35]      |
| Malformin C                                                                                                                                                                                    |                                                                                                                                                                                                                                                                                                                                                                                                                                                                                                                                                                                                         | Eurotiales          | [40]      |
| Clavatustide B                                                                                                                                                                                 |                                                                                                                                                                                                                                                                                                                                                                                                                                                                                                                                                                                                         | Eurotiales          | [28]      |
| Ergosterol (1)<br>Rosellichalasin (2)<br>Cytochalasin E (3)                                                                                                                                    | <br>1<br>2<br>3                                                                                                                                                                                                                                                                                                                                                                                                                                                                                                                                                                                        | Eurotiales          | [27]      |

|                                                                                                                                                                                       |                                                                                                                                                                                                                                                                                                                                                                                                                                                                                                                                                                                                                                                                                                 |            |      |
|---------------------------------------------------------------------------------------------------------------------------------------------------------------------------------------|-------------------------------------------------------------------------------------------------------------------------------------------------------------------------------------------------------------------------------------------------------------------------------------------------------------------------------------------------------------------------------------------------------------------------------------------------------------------------------------------------------------------------------------------------------------------------------------------------------------------------------------------------------------------------------------------------|------------|------|
| Asperterone B (1) and C (2)                                                                                                                                                           | 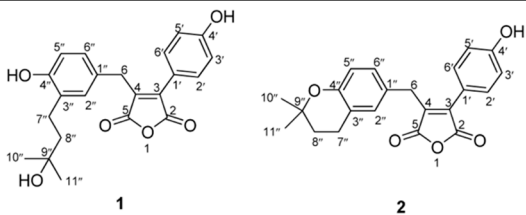 <p style="text-align: center;">1                      2</p>                                                                                                                                                                                                                                                                                                                                                                                                                                                                                                                                                  | Eurotiales | [41] |
| Isocoumarin (R)-mellein (1)<br>Penicillic acid (2)<br><i>cis</i> -4-hydroxmellein (3)<br><i>trans</i> -4-hydroxmellein (4)                                                            |  <p style="text-align: center;">1                      3                      4</p> <p style="text-align: center;">2</p>                                                                                                                                                                                                                                                                                                                                                                                                                                                                                      | Eurotiales | [26] |
| Acetylaranotin (1)<br>Acetylapoaranotin (2)<br>Deoxyapoaranotin (3)                                                                                                                   |  <p style="text-align: center;">Acetylaranotin (1)      Acetylapoaranotin (2)      Deoxyapoaranotin (3)</p>                                                                                                                                                                                                                                                                                                                                                                                                                                                                                                   | Eurotiales | [42] |
| Pityriacitrin                                                                                                                                                                         |                                                                                                                                                                                                                                                                                                                                                                                                                                                                                                                                                                                                               | Eurotiales | [92] |
| Bis(dethio)bis(methylsulfanyl)gliotoxin (1)<br>6-acetylbis(dethio)bis(methylsulfanyl)gliotoxin (2)<br>Acetylgliotoxin G (3)<br>Gliotoxin (4)<br>Acetylgliotoxin (5)<br>Fiscalin B (6) |  <p style="text-align: center;">1                      2                      3</p> <p style="text-align: center;">4                      5                      6</p>                                                                                                                                                                                                                                                                                                                                                                                                                                      | Eurotiales | [44] |
| 1,8-Dihydroxy-3-methoxy-6-methylanthraquinone                                                                                                                                         |                                                                                                                                                                                                                                                                                                                                                                                                                                                                                                                                                                                                             | Eurotiales | [23] |
| Chevalone C (2)<br>Nortryptoquivaline (4)<br>Tryptoquivaline H (6)<br>Fiscalin A (8)<br><i>epi</i> -fiscalin A (9) and C (13)<br><i>epi</i> -neofiscalin A (11)                       |  <p style="text-align: center;">4: R<sub>1</sub> = H                      6: R<sub>1</sub> = OH, R<sub>2</sub> = H</p> <p style="text-align: center;">8: R<sub>1</sub> = R<sub>2</sub> = H, R<sub>3</sub> = CH(CH<sub>3</sub>)<sub>2</sub>, R<sub>4</sub> = Me<br/>9: R<sub>1</sub> = CH(CH<sub>3</sub>)<sub>2</sub>, R<sub>2</sub> = R<sub>4</sub> = H, R<sub>3</sub> = Me<br/>11: R<sub>1</sub> = CH(CH<sub>3</sub>)<sub>2</sub>, R<sub>2</sub> = R<sub>3</sub> = H, R<sub>4</sub> = Me<br/>13: R<sub>1</sub> = CH(CH<sub>3</sub>)<sub>2</sub>, R<sub>2</sub> = H, R<sub>3</sub> = R<sub>4</sub> = Me</p> | Eurotiales | [46] |

|                                                                                                                                                                                                                                                                                                                                                     |                                                                                                                                                                                                                                                                                                                                                                    |            |      |
|-----------------------------------------------------------------------------------------------------------------------------------------------------------------------------------------------------------------------------------------------------------------------------------------------------------------------------------------------------|--------------------------------------------------------------------------------------------------------------------------------------------------------------------------------------------------------------------------------------------------------------------------------------------------------------------------------------------------------------------|------------|------|
| 1,2,3,4-Tetrahydro-2-methyl-3-methylene-1,4-dioxypyrazino[1,2-a]indole (4)<br>1,2,3,4-Tetrahydro-2-methyl-1,3,4-trioxypyrazino[1,2-a]indole (5)<br>Reduced gliotoxin (9)<br>6-Acetylbis(methylthio)gliotoxin (10)<br>Bisdethiobis(methylthio)gliotoxin (11)<br>Didehydrobisdethiobis(methylthio)gliotoxin (12)<br>Bis- <i>N</i> -norgliovictin (13) | 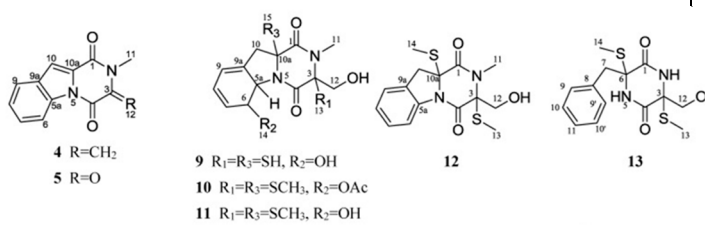 <p> 4 R=CH<sub>2</sub><br/> 5 R=O<br/> 9 R<sub>1</sub>=R<sub>3</sub>=SH, R<sub>2</sub>=OH<br/> 10 R<sub>1</sub>=R<sub>3</sub>=SCH<sub>3</sub>, R<sub>2</sub>=OAc<br/> 11 R<sub>1</sub>=R<sub>3</sub>=SCH<sub>3</sub>, R<sub>2</sub>=OH </p>                                     | Eurotiales | [48] |
| Isopenicillin A                                                                                                                                                                                                                                                                                                                                     |                                                                                                                                                                                                                                                                                  | Eurotiales | [50] |
| Arenicolin A                                                                                                                                                                                                                                                                                                                                        |                                                                                                                                                                                                                                                                                 | Eurotiales | [21] |
| <i>cis</i> -bis(methylthio)silvatin                                                                                                                                                                                                                                                                                                                 |                                                                                                                                                                                                                                                                                | Eurotiales | [51] |
| Epoxydon (1)<br>3,6,8-trihydroxy-1-methylxanthone (2)<br>Gentisyl alcohol (3)<br>( <i>R,S</i> )-1-phenyl-1,2-ethanediol (4)<br>Dehydrodechlorogriseofulvin (5)<br>Dechlorogriseofulvin (6)<br>Griseofulvin (7)<br>Ethylene glycol benzoate (8)<br>Alternariol (9)<br>Griseoxanthone C (10)<br>Drimiopsin H (11)<br>Griseophenone B (12) and C (13)  | Not specified                                                                                                                                                                                                                                                                                                                                                      | Eurotiales | [53] |
| Kongililine A (1), B (7)<br>Pebrolide (2)<br>1-deoxypebrolide (3)<br>Asperphenamate (4)<br>Asperphenamate B (5), C (6)<br><i>N</i> -benzoyl-phenylalaninol (8)<br>Orsellinic acid (9)<br>Mycophenolic acid (10)<br>5, 7-dihydroxy-4-methylphthalide (11)                                                                                            |  <p> 1 R<sub>1</sub> = H R<sub>2</sub> = OH<br/> 2 R<sub>1</sub> = OH R<sub>2</sub> = OAc<br/> 3 R<sub>1</sub> = H R<sub>2</sub> = OAc<br/> 4 R<sub>1</sub> = H R<sub>2</sub> = H<br/> 5 R<sub>1</sub> = OH R<sub>2</sub> = H<br/> 6 R<sub>1</sub> = H R<sub>2</sub> = OH </p> | Eurotiales | [55] |

|                                                                                                     |                                                                                      |              |      |
|-----------------------------------------------------------------------------------------------------|--------------------------------------------------------------------------------------|--------------|------|
| (-)-Brevianamide C                                                                                  | 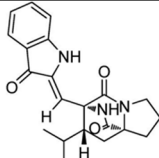    | Eurotiales   | [29] |
| Fructigenine A (3)<br>Verrucosidin (8)<br>Norverrucosidin (9)                                       |    | Eurotiales   | [30] |
| Penipacids A (1) and E (5)                                                                          |    | Eurotiales   | [57] |
| 1-Hydroxy-10-methoxy-dibenz[b,<br>e]oxepin-6,11-dione (1)<br>Chrysazin (2)<br>Globosuxanthone A (3) |    | Hypocreales  | [73] |
| Camptothecin                                                                                        |    | Hypocreales  | [69] |
| Destruxin A, B and E                                                                                |   | Hypocreales  | [75] |
| Trichodermaid A (1), B (2) and C (5)<br>Aspergilloid G (3)<br>Rhinomilisin E (4) and G (6)          |  | Hypocreales  | [72] |
| (6aR, 6bS, 7S)-3, 6a, 7, 10-tetra-hydroxy-4,<br>9-dioxo-4, 6a, 6b, 7, 8, 9-<br>hexahydroperylene    |   | Pleosporales | [79] |
| di-2-ethylhexyl phthalate                                                                           |  | Pleosporales | [23] |
| (3R, 6R) hyalodendrin                                                                               |   | Pleosporales | [81] |

|                                                                                                                                                                                                                                                      |  |              |      |
|------------------------------------------------------------------------------------------------------------------------------------------------------------------------------------------------------------------------------------------------------|--|--------------|------|
| Secalonic acid A (1), E (2) and G (3)<br>Penicillixanthone A (4) and B (5)<br>Blennolide J (10)<br>Hypothemycin (12)                                                                                                                                 |  | Pleosporales | [80] |
| Chaetocochin J                                                                                                                                                                                                                                       |  | Sordariales  | [84] |
| Chaetocochin A (2) and C (3)                                                                                                                                                                                                                         |  | Sordariales  | [83] |
| Chaetoglobosin A (1), G (2), V (3), Vb (4),<br>E (6), F (7), Fex (8), Fa (10)<br>20-dihydrochaetoglobosin A (9)                                                                                                                                      |  | Sordariales  | [82] |
| Trichocladinols E (2), F (3) and G (4)                                                                                                                                                                                                               |  | Sordariales  | [85] |
| [5'-formyl-2'-hydroxyl-4'-methoxy-( <i>E,E</i> )-<br>sorbophenone (1)<br>Scalbicillin B (3)<br>1-(2'-hydroxy-4'-methoxy-5'-methylphenyl)-2,4- <i>E,E</i> -hexadien-1-one (4)<br>5'-formyl-2'-hydroxy-4'-methoxy-( <i>E</i> )-4-<br>hexenophenone (5) |  | Sordariales  | [86] |
| 8,8'-Bijuglone                                                                                                                                                                                                                                       |  | Capnodiales  | [88] |
| Taxol                                                                                                                                                                                                                                                |  | Capnodiales  | [87] |

|                                                                                                                                                           |                                                                                                                                                                                                                                                                       |              |      |
|-----------------------------------------------------------------------------------------------------------------------------------------------------------|-----------------------------------------------------------------------------------------------------------------------------------------------------------------------------------------------------------------------------------------------------------------------|--------------|------|
| <p>Phomolactonexanthone A (1), B (2) and C (3)</p> <p>Dicerandrol A (4), B (5) and C (6)</p> <p>Deacetylphomoxanthone B (7)</p> <p>Penexanthone A (8)</p> | <p>1: R<sub>1</sub>=R<sub>2</sub>=H<br/>2: R<sub>1</sub>=Ac R<sub>2</sub>=H<br/>3: R<sub>1</sub>=R<sub>2</sub>=Ac</p> <p>4: R<sub>1</sub>=R<sub>2</sub>=H<br/>5: R<sub>1</sub>=Ac R<sub>2</sub>=H<br/>6: R<sub>1</sub>=R<sub>2</sub>=Ac</p> <p>7: R=H<br/>8: R=Ac</p> | Diaporthales | [93] |
| 5-methylmellein                                                                                                                                           |                                                                                                                                                                                                                                                                       | Xylariales   | [96] |
| <p>Daldinone F (1)</p> <p>Nodulisporin G (2)</p> <p>Dalmanol C (3)</p>                                                                                    | <p>1<br/>2<br/>3</p>                                                                                                                                                                                                                                                  | Xylariales   | [97] |
| Xylarenone C (6) and D (7)                                                                                                                                | <p>6<br/>7</p>                                                                                                                                                                                                                                                        | Boliniales   | [99] |
| <p>Greensporone A (1), C (5)</p> <p>Dechlorogreensporone A (4), D (10)</p> <p>O-Desmethylgreensporone C (6)</p>                                           | <p>1: R = Cl<br/>4: R = H<br/>5: R<sub>1</sub> = CH<sub>3</sub> R<sub>2</sub> = H R<sub>3</sub> = H<br/>6: R<sub>1</sub> = H R<sub>2</sub> = H R<sub>3</sub> = H<br/>10: R<sub>1</sub> = CH<sub>3</sub> R<sub>2</sub> = H R<sub>3</sub> = OH</p>                      | Leotiales    | [98] |
